# Supplementary material for: Dual-Modality Imaging Probes with High Magnetic Relaxivity and Near-Infrared Fluorescence Based Highly Aminated Mesoporous Silica Nanoparticles
Source: Hindawi journal article supplement (doi:10.1155/2016/6502127), 2016-01-01
Supplement: f1 [file 6502127.f1.pdf]

# Supplementary Information

## Dual-modality Imaging Probes with High Magnetic Relaxivity and Near Infrared Fluorescence Based Highly Aminated Mesoporous Silica Nanoparticles

Zhu Fei-Peng<sup>a,b</sup>, Chen Guo-Tao<sup>c</sup>, Wang Shou-Ju<sup>a</sup>, Liu Ying<sup>a</sup>, Tang Yu-Xia<sup>a</sup>, Tian Ying<sup>a</sup>, Wang Jian-Dong<sup>d</sup>, Wang Chun-Yan<sup>a</sup>, Wang Xin<sup>a</sup>, Sun Jing<sup>a</sup>, Teng Zhao-Gang<sup>\*,a</sup>, Lu Guang-Ming<sup>\*,a</sup>

<sup>a</sup>Department of Medical Imaging, Jinling Hospital, School of Medicine, Nanjing University, Nanjing 210002, P. R. China.

<sup>b</sup>Department of Medical Imaging, the First Affiliated Hospital with Nanjing Medical University, Nanjing 210029, P. R. China.

<sup>c</sup>Department of Medicine, Nanjing University, Nanjing 210093, P. R. China.

<sup>d</sup>Department of Pathology, Jinling Hospital, School of Medicine, Nanjing University, Nanjing 210002, P. R. China.

\*Corresponding author:

Lu Guang-Ming, [cjr.luguangming@vip.163.com](mailto:cjr.luguangming@vip.163.com) or Teng Zhao-Gang, [tzg@fudan.edu.cn](mailto:tzg@fudan.edu.cn)

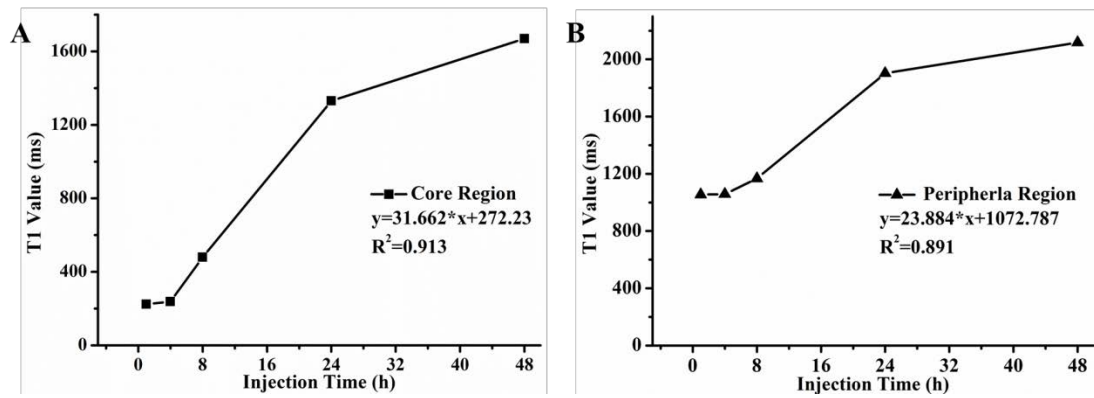

**Fig. S1** Time-intensity curve quantitative analyze MR  $T_1$  value of different tumor portion.

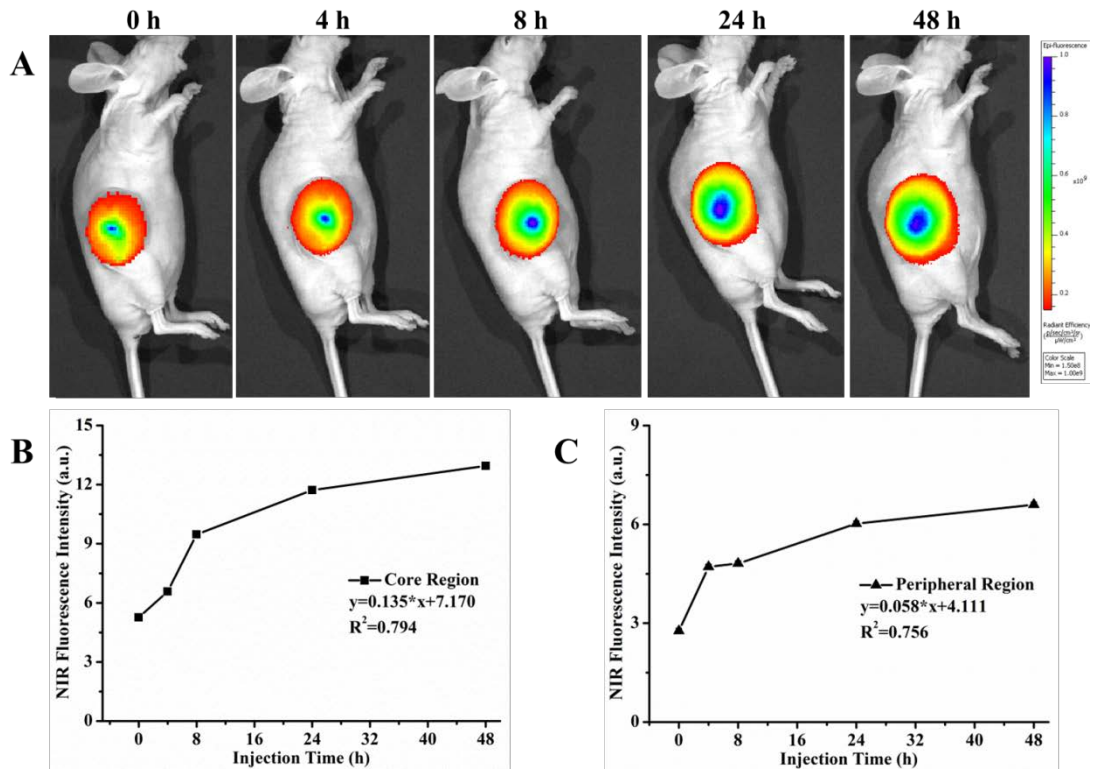

**Fig. S2** In vivo NIR fluorescence imaging of U87–MG tumor bearing mice model (sagittal position) after intra–tumoral injection of Gd/NIR–MSNs at 0, 4, 8, 24 and 48 h (A). Time-intensity curve quantitative analyze NIR fluorescence intensity (B and C) of different tumor portion.
